# Supplementary material
Source: Springer Nature journal article supplement (https://www.springermedizin.de/resource/supplementary/12936_2007_349_MOESM4_ESM.pdf/9547610)

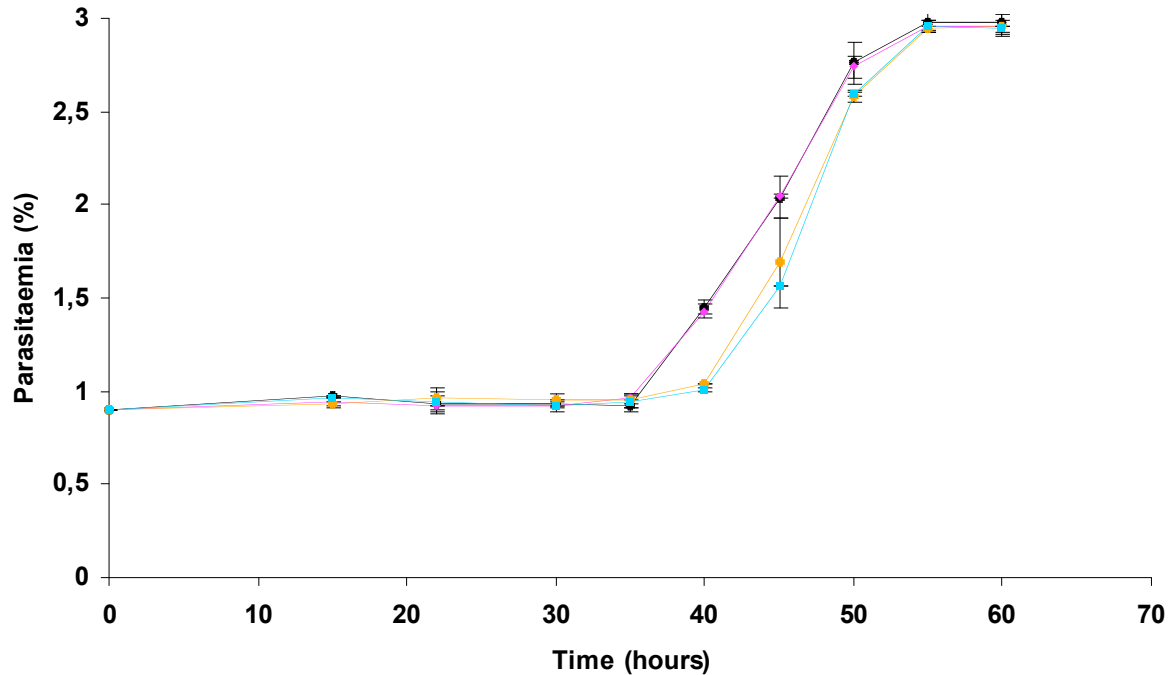

—●— 5%O2 —◆— R 21%O2 —●— TA 21%O2 —◆— S 21%O2

Supplement: MOESM4 [file 9547610]
